# Supplementary material for: Evaluating the Implementation Quality of a Social and Emotional Learning Program: A Mixed Methods Approach
Source: MDPI journal article supplement (doi:10.3390/ijerph17093249), 2020-05-07
Supplement: s1 [file s1]

**Table S1:** Details of Implementation Indicators

| Fidelity Measure           | Instrument                   | Indicator                                                           | Question                                                                                                                                                                                                                                                                                                                                                                              | Rating Scale            | Scoring                                                                                                                                                                                         |
|----------------------------|------------------------------|---------------------------------------------------------------------|---------------------------------------------------------------------------------------------------------------------------------------------------------------------------------------------------------------------------------------------------------------------------------------------------------------------------------------------------------------------------------------|-------------------------|-------------------------------------------------------------------------------------------------------------------------------------------------------------------------------------------------|
| <b>Dosage</b>              |                              |                                                                     |                                                                                                                                                                                                                                                                                                                                                                                       |                         |                                                                                                                                                                                                 |
| 1                          | Teacher Weekly Report        | Delivery of each session                                            | <ul style="list-style-type: none"> <li>Did you deliver this session?</li> </ul>                                                                                                                                                                                                                                                                                                       | No=0<br>Yes=1           | <ul style="list-style-type: none"> <li>Summed score across 12 sessions.</li> <li>Convert to percent score</li> </ul>                                                                            |
| 2                          | Student Review Questionnaire | Student attendance for each session                                 | <ul style="list-style-type: none"> <li>Tick all the sessions you remember being present for.</li> </ul>                                                                                                                                                                                                                                                                               | No=0<br>Yes=1           | <ul style="list-style-type: none"> <li>Summed score across 12 sessions.</li> <li>Average score for students within each school.</li> <li>Convert to percent score</li> </ul>                    |
| <b>Adherence</b>           |                              |                                                                     |                                                                                                                                                                                                                                                                                                                                                                                       |                         |                                                                                                                                                                                                 |
| 1                          | Teacher Weekly Report        | Key lesson activities implemented (3 items)                         | <ul style="list-style-type: none"> <li>Were you able to complete activity 1 in the time?</li> <li>Were you able to complete activity 2 in the time?</li> <li>Did you play the recommended video?</li> </ul>                                                                                                                                                                           | No=0<br>Yes=1           | <ul style="list-style-type: none"> <li>Summed score for each session.</li> <li>Summed score across 12 sessions.</li> <li>Convert to percent score</li> </ul>                                    |
| 2                          | Teacher Weekly Report        | Teacher rated adherence to each session (1 item)                    | <ul style="list-style-type: none"> <li>What percentage of the session did you complete?</li> </ul>                                                                                                                                                                                                                                                                                    | 0% = 1<br>100% = 6      | <ul style="list-style-type: none"> <li>Average score across 12 sessions.</li> <li>Convert to percent score</li> </ul>                                                                           |
| <b>Quality of Delivery</b> |                              |                                                                     |                                                                                                                                                                                                                                                                                                                                                                                       |                         |                                                                                                                                                                                                 |
| 1                          | Student Review Questionnaire | Student ratings of aspects of teacher quality of delivery (6 items) | <ul style="list-style-type: none"> <li>Please rate how often your teacher did the following during the delivery of MindOut:</li> <li>Was confident in their own knowledge and skills around each session.</li> <li>Was enthusiastic (passionate) when delivering the sessions.</li> <li>Made critical or negative remarks about the students during the sessions (Reverse)</li> </ul> | Never = 1<br>Always = 5 | <ul style="list-style-type: none"> <li>Average score for all 6 questions for each student.</li> <li>Average score for students within each school.</li> <li>Convert to percent score</li> </ul> |

|                                   |                              |                                                                        |                                                                                                                                                                                                                                                                                                                               |                                |                                                                                                                                                                                                    |
|-----------------------------------|------------------------------|------------------------------------------------------------------------|-------------------------------------------------------------------------------------------------------------------------------------------------------------------------------------------------------------------------------------------------------------------------------------------------------------------------------|--------------------------------|----------------------------------------------------------------------------------------------------------------------------------------------------------------------------------------------------|
|                                   |                              |                                                                        | <ul style="list-style-type: none"> <li>• Showed appreciation when students shared comments and participated</li> <li>• Kept students engaged and interested in the session.</li> <li>• Seemed well-prepared and organized for the sessions.</li> </ul>                                                                        |                                |                                                                                                                                                                                                    |
| 2                                 | Student Review Questionnaire | Individual student rating teacher quality of delivery overall (1 item) | <ul style="list-style-type: none"> <li>• Please rate from 1 (poor) to 10 (excellent) how well your teacher delivered the MindOut program.</li> </ul>                                                                                                                                                                          | Poor = 1<br>Excellent = 10     | <ul style="list-style-type: none"> <li>• Average score for students within each school.</li> <li>• Convert to percent score</li> </ul>                                                             |
| <b>Participant Responsiveness</b> |                              |                                                                        |                                                                                                                                                                                                                                                                                                                               |                                |                                                                                                                                                                                                    |
| 1                                 | Teacher Weekly Report        | Teacher rating of students response to key lesson activities (3 items) | <ul style="list-style-type: none"> <li>• How did the students respond to the first activity?</li> <li>• How did the students respond to the second activity?</li> <li>• How did the students respond to the video(s)?</li> </ul>                                                                                              | Very Poorly=1<br>Very Well = 5 | <ul style="list-style-type: none"> <li>• Average score for all 3 questions within each session.</li> <li>• Average score across 12 sessions.</li> <li>• Convert to percentage</li> </ul>           |
| 2                                 | Teacher Weekly Report        | Teacher rating of students' interaction with the session (1 item)      | <ul style="list-style-type: none"> <li>• Did the students show interest in this session?</li> <li>• Did the students learn new skills during this session?</li> <li>• Did the students engage/participate in the activities and discussions?</li> </ul>                                                                       | Not at all=1<br>Very much = 5  | <ul style="list-style-type: none"> <li>• Average score for all 3 questions within each school across 12 sessions.</li> <li>• Convert to percentage</li> </ul>                                      |
| 3                                 | Student Review Questionnaire | Students' ratings of their interaction with the program (4 items)      | <ul style="list-style-type: none"> <li>• The sessions in the program were relevant for me.</li> <li>• The sessions in the program were useful for helping to deal with situations.</li> <li>• The content of the program sessions was easy to understand.</li> <li>• The sessions in the program were interesting.</li> </ul> | Not at all=1<br>Very much = 5  | <ul style="list-style-type: none"> <li>• Average score for all 4 questions for each student.</li> <li>• Average score for students within each school.</li> <li>• Convert to percentage</li> </ul> |
| 4                                 | Student Review Questionnaire | Students' rating of the program overall (1 item)                       | <ul style="list-style-type: none"> <li>• How would you rate the MindOut program overall?</li> </ul>                                                                                                                                                                                                                           | Poor = 1<br>Excellent = 10     | <ul style="list-style-type: none"> <li>• Average score for students within each school.</li> <li>• Convert to percent score</li> </ul>                                                             |

**Table S2:** Visual binning (VB) scores for schools across dimensions and total implementation quality

| <i>School ID</i> | <b>Dosage<br/>Total<br/>VB score</b> | <b>Adherence Total<br/>VB score</b> | <b>Quality of Delivery<br/>Total<br/>VB score</b> | <b>Participant<br/>Responsiveness<br/>Total VB score</b> | <b>Total Implementation<br/>Quality VB score</b> | <b>Total Implementation<br/>Quality Group</b> |
|------------------|--------------------------------------|-------------------------------------|---------------------------------------------------|----------------------------------------------------------|--------------------------------------------------|-----------------------------------------------|
| <i>#1</i>        | 3                                    | 2                                   | 2                                                 | 1                                                        | 2                                                | Low                                           |
| <i>#2</i>        | 3                                    | 3                                   | 4                                                 | 2                                                        | 3                                                | High                                          |
| <i>#3</i>        | 1                                    | 1                                   | 2                                                 | 1                                                        | 1                                                | Low                                           |
| <i>#4</i>        | 3                                    | 3                                   | 1                                                 | 1                                                        | 2                                                | Low                                           |
| <i>#5</i>        | 1                                    | 1                                   | 1                                                 | 1                                                        | 1                                                | Low                                           |
| <i>#6</i>        | 2                                    | 2                                   | 2                                                 | 2                                                        | 2                                                | Low                                           |
| <i>#7</i>        | 3                                    | 4                                   | 3                                                 | 4                                                        | 4                                                | High                                          |
| <i>#8</i>        | 3                                    | 4                                   | 3                                                 | 3                                                        | 3                                                | High                                          |
| <i>#9</i>        | 3                                    | 3                                   | 3                                                 | 3                                                        | 3                                                | High                                          |
| <i>#10</i>       | 2                                    | 2                                   | 1                                                 | 3                                                        | 2                                                | Low                                           |
| <i>#11</i>       | 2                                    | 3                                   | 2                                                 | 2                                                        | 2                                                | Low                                           |
| <i>#12</i>       | 2                                    | 3                                   | 3                                                 | 3                                                        | 3                                                | High                                          |
| <i>#13</i>       | 3                                    | 3                                   | 4                                                 | 4                                                        | 4                                                | High                                          |
| <i>#14</i>       | 3                                    | 2                                   | 4                                                 | 3                                                        | 3                                                | High                                          |
| <i>#15</i>       | 3                                    | 2                                   | 2                                                 | 2                                                        | 2                                                | Low                                           |
| <i>#16</i>       | 3                                    | 4                                   | 2                                                 | 3                                                        | 3                                                | High                                          |

<sup>a</sup> VB = Visual Binning Score, <sup>b</sup> Low =1; Moderately Low=2; Moderately High=3; High=4, <sup>c</sup> Total Implementation Quality Group: Low =8; High=8

**Table S3:** Similarities and differences between high- and low-implementing groups (Teacher and Student data).

| Themes                                | Informant      | High-implementation group (n=8)                                                                                                                                                | Both Groups                                                                                                                                                                                                                           | Low-implementation group (n= 8)                                                                                                                                                                     |
|---------------------------------------|----------------|--------------------------------------------------------------------------------------------------------------------------------------------------------------------------------|---------------------------------------------------------------------------------------------------------------------------------------------------------------------------------------------------------------------------------------|-----------------------------------------------------------------------------------------------------------------------------------------------------------------------------------------------------|
| 1. <b>Program Content Factors</b>     | <b>Teacher</b> |                                                                                                                                                                                | <p>Felt the program was relevant for students.</p> <p>Commented on the program's user-friendliness and easy accessibility to resources.</p> <p>Praised the variety of teaching strategies, particularly the interactive elements.</p> |                                                                                                                                                                                                     |
|                                       | <b>Student</b> |                                                                                                                                                                                | Thought that some sessions in the program were too long or felt rushed.                                                                                                                                                               | Reported that they experienced disruptions during the sessions and/or peer disengagement.                                                                                                           |
| 2. <b>Participant Characteristics</b> | <b>Teacher</b> | <p>More positive comments when discussing group dynamic.</p> <p>More likely to discuss students' engagement and response to the program in a positive light.</p>               |                                                                                                                                                                                                                                       | <p>More issues with the group dynamic (high-need, difficult, low emotional literacy, low resilience etc.)</p> <p>More negative comments in terms of student engagement and response to program.</p> |
|                                       | <b>Student</b> | <p>Reported more benefits from the program in terms of helpfulness.</p> <p>Provided specific examples of how the program impacted on their learning and skill development.</p> | <p>Found some parts of the program boring.</p> <p>Found the program interesting.</p>                                                                                                                                                  | <p>More likely to report negative experiences with the program.</p> <p>Less likely to report the program benefitting them and did not provide examples of skill development.</p>                    |

|    |                                  |                                                                                                                                                 |                                                                                                                                                          |                                                                                                                                                                      |
|----|----------------------------------|-------------------------------------------------------------------------------------------------------------------------------------------------|----------------------------------------------------------------------------------------------------------------------------------------------------------|----------------------------------------------------------------------------------------------------------------------------------------------------------------------|
|    |                                  | More likely to report enjoyment of the program and discuss positive experiences.                                                                |                                                                                                                                                          |                                                                                                                                                                      |
| 3. | <b>Teacher Characteristics</b>   | More likely to demonstrate positive attitudes towards program.                                                                                  | Felt that comfort, interest and teaching background were important for implementation.<br><br>Agreed the training was good.                              |                                                                                                                                                                      |
|    | <b>Student</b>                   |                                                                                                                                                 |                                                                                                                                                          | Commented on their teachers' poor delivery of the program.                                                                                                           |
| 4. | <b>School Contextual Factors</b> |                                                                                                                                                 | Identified 'timing' as a major issue in implementing the program.<br><br>Felt delivering the program early in the year would make implementation easier. | Discussed issues delivering the program to TY students.<br><br>Faced issues with accessing technology.                                                               |
|    | <b>Student</b>                   |                                                                                                                                                 | Thought that some sessions in the program were too long or felt rushed.                                                                                  | Reported that they experienced disruptions during the sessions and/or peer disengagement.                                                                            |
| 5. | <b>Organizational Factors</b>    | Expressed a desire to receive external support in terms of updates from Health Promotion Officers and support groups for teachers implementing. | Felt other staff didn't value the program and that they would like more support from their colleagues.                                                   | Would have liked more support at the management level.<br><br>Felt they could be supported by having an external person visiting the school to deliver the sessions. |
